# Supplementary material
Source: Springer Nature journal article supplement (https://www.springermedizin.de/resource/supplementary/13041_2012_174_MOESM5_ESM.pdf/25657646)

A

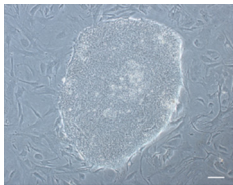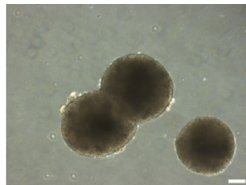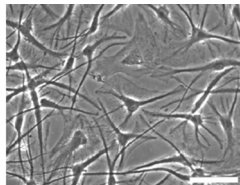

iPSCs

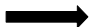

Neurospheres

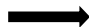

Astrocytes

3-4 weeks

Neural medium

+bFGF

2-3 months

Astrocyte

medium

B

S100 $\beta$  DAPIS100 $\beta$  DAPI

GFAP DAPI

GFAP DAPI

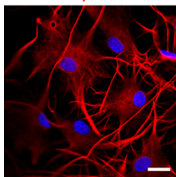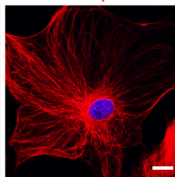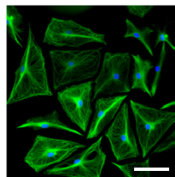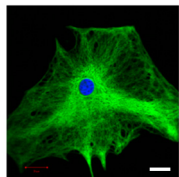

Supplement: MOESM5 [file 25657646]
